# Supplementary material for: Surfactant-free fabrication of CaTiO3 butterfly-like dendrite via a simple one-step hydrothermal route
Source: Royal Society of Chemistry journal article supplement (doi:10.1039/c2ce25472g), 2012-01-01
Supplement: c2ce25472g.pdf [file c2ce25472g.pdf]

## The supporting information

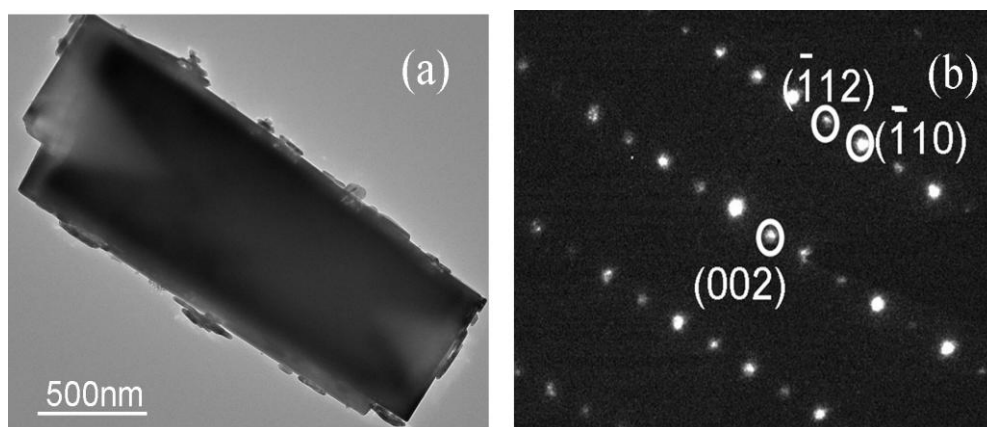

Figure S1 (a) the TEM image of an individual  $\text{CaTiO}_3$  prism, (b) the corresponding SAED pattern along  $[\bar{1}10]$  zone axis.

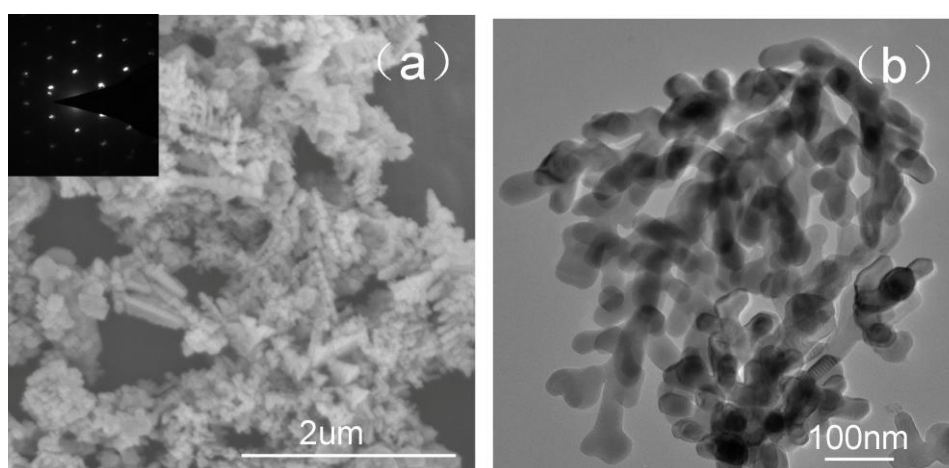

Figure S2 images of the  $\text{SrTiO}_3$  dendrites synthesized at  $180^\circ\text{C}$  for 36 h in 3 M NaOH solution: (a) FESEM image and the corresponding SAED pattern (inset), (b) TEM image.
